# Supplementary material for: Inhibition of Nipah Virus Infection In Vivo: Targeting an Early Stage of Paramyxovirus Fusion Activation during Viral Entry
Source: PubMed Central journal article supplement (PMC2965769; doi:10.1371/journal.ppat.1001168), 2010-10-28
Supplement: ppat.1001168.s003.pdf [file ppat.1001168.s003.pdf]

|                                   | HPIV3 viral titer (pfu/ml 10 <sup>3</sup> ) |           |           |           |           |
|-----------------------------------|---------------------------------------------|-----------|-----------|-----------|-----------|
|                                   | Day 1                                       | Day 2     | Day 3     | Day 5     | Day 7     |
| untreated                         | 0.6+/-0.2                                   | 3.8+/-0.9 | 7.4+/-0.6 | 4.6+/-1.8 | 1.0+/-0.4 |
| V-chol (1uM)                      | 1.0+/-0.8                                   | 3.8+/-0.9 | 8.5+/-2.7 | 12+/-3.0  | 2.7+/-0.8 |
| V-PEG <sub>4</sub> -Chol (1uM)    | 0.3+/-0.2                                   | 3.8+/-1.6 | 10+/-1.9  | 3.0+/-0.6 | 11+/-1.9  |
| VIKI-PEG <sub>4</sub> -Chol (1uM) | 0.9+/-0.8                                   | 0.7+/-0.7 | 2.0+/-0.2 | 1.6+/-0.6 | 3.3+/-1.3 |

**Table S1.** Viral titer collected from the apical surface of HAE cells infected with wt HPIV3, in the presence of the indicated treatments.
